# Supplementary material
Source: MDPI journal article supplement (https://www.mdpi.com/2254-9625/14/4/61)
Supplement: s1 [file s1]

**Table S1***Descriptive statistics and group comparisons of WDQ scores*

| Sample                                                 | Women       | Men         | <i>t</i> | <i>p</i> |
|--------------------------------------------------------|-------------|-------------|----------|----------|
| <i>Parents of a child with T1D (study 1)</i>           |             |             |          |          |
| <i>n</i>                                               | 127         | 113         |          |          |
| <i>M</i> <sub>WDQ</sub> ( <i>SD</i> )                  | 3.32 (1.04) | 3.32 (0.99) | 0.92     | .359     |
| <i>Parents of a child with cancer (study 2)</i>        |             |             |          |          |
| <i>n</i>                                               | 65          | 60          |          |          |
| <i>M</i> <sub>WDQ</sub> ( <i>SD</i> )                  | 4.13 (0.79) | 4.32 (0.58) | 1.44     | .157     |
| <i>Couples coping with visual impairment (study 3)</i> |             |             |          |          |
| IVIs                                                   |             |             |          |          |
| <i>n</i>                                               | 55          | 55          |          |          |
| <i>M</i> <sub>WDQ</sub> ( <i>SD</i> )                  | 2.85 (1.05) | 3.35 (0.96) | -2.63    | .010     |
| Partners                                               |             |             |          |          |
| <i>n</i>                                               | 56          | 50          |          |          |
| <i>M</i> <sub>WDQ</sub> ( <i>SD</i> )                  | 3.12 (0.91) | 3.13 (0.93) | -0.02    | .987     |

*Note.* Possible range of WDQ mean score: 0-5. T1D = type 1 diabetes; IVIs = individuals with visual impairment
